# Supplementary material for: Converting Spent Cu/Fe Layered Double Hydroxide into Cr(VI) Reductant and Porous Carbon Material
Source: PubMed Central journal article supplement (PMC5544766; doi:10.1038/s41598-017-07775-8), 2017-08-04
Supplement: 41598_2017_7775_MOESM1_ESM.pdf [file 41598_2017_7775_MOESM1_ESM.pdf]

# Converting Spent Cu/Fe Layered Double Hydroxide into Cr(VI) Reductant and Porous Carbon Material

Minwang Laipan<sup>a,b,c</sup>, Haoyang Fu<sup>a,b</sup>, Runliang Zhu<sup>a,\*</sup>, Luyi Sun<sup>c,\*</sup>, Jianxi Zhu<sup>a</sup>, Hongping He<sup>a,b</sup>

<sup>a</sup> CAS Key Laboratory of Mineralogy and Metallogeny / Guangdong Provincial Key Laboratory of Mineral Physics and Materials, Guangzhou Institute of Geochemistry, Chinese Academy of Sciences (CAS), Guangzhou 510640, China

<sup>b</sup> University of Chinese Academy of Sciences, Beijing 100049, China

<sup>c</sup> Department of Chemical & Biomolecular Engineering, Polymer Program, Institute of Materials Science, University of Connecticut, Storrs, CT 06269, USA

\* Corresponding author

Dr. Runliang Zhu, E-mail: [zhurl@gig.ac.cn](mailto:zhurl@gig.ac.cn), Phone: +86-020-85297603

Dr. Luyi Sun, E-mail: [luyi.sun@uconn.edu](mailto:luyi.sun@uconn.edu), Phone: +1-860-486-6895

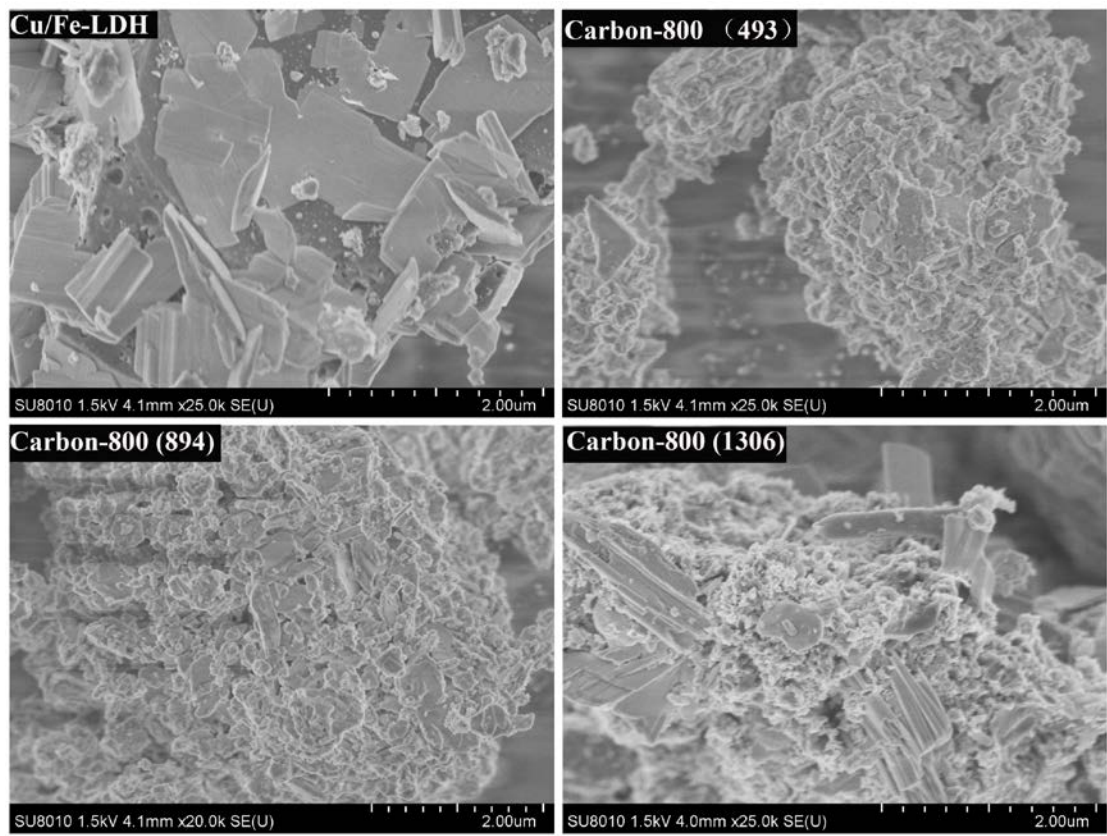

Figure s1. SEM images of Cu/Fe-LDH and carbon materials obtained from the spent Cu/Fe-LDH with various adsorbed amounts of OII via carbonizing at 800°C and acid washing. 493, 894, and 1306 mg/g represent the adsorbed amount of OII on the Cu/Fe-LDH

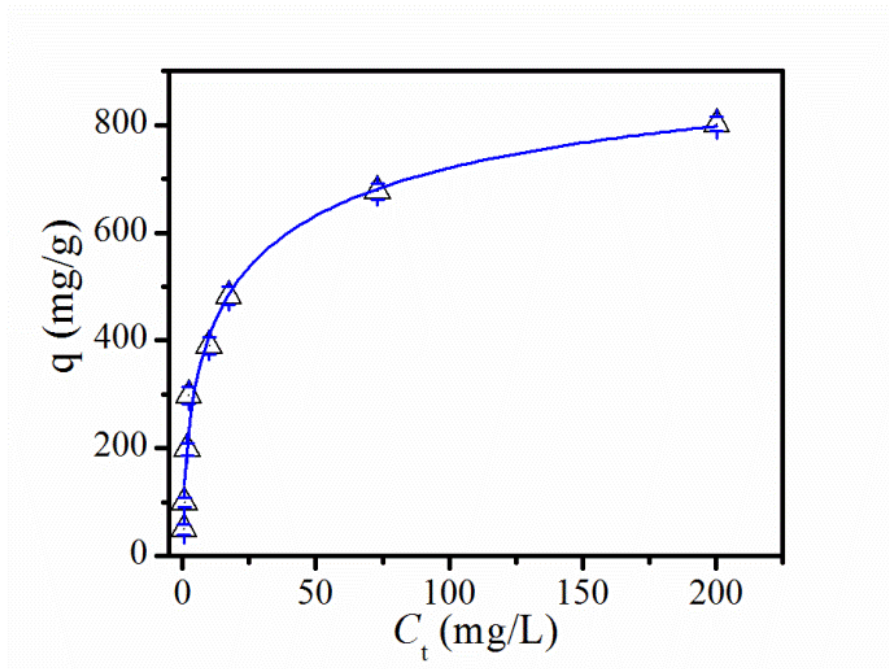

Figure s2. Adsorption isotherm of Orange II on Cu/Fe-LDH under 25°C

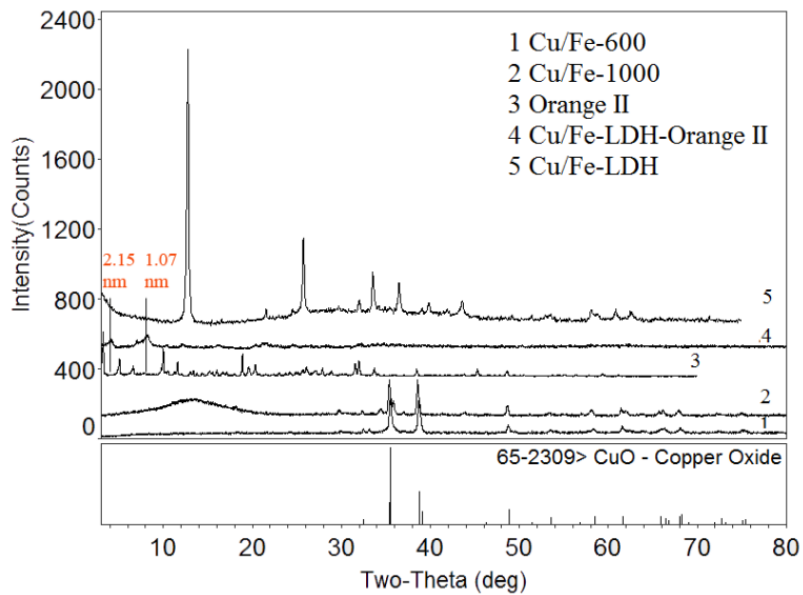

Figure s3. XRD patterns of Orange II, spent Cu/Fe-LDH (Cu/Fe-LDH-Orange II), Cu/Fe-LDH, Fe/Cu-600, and Fe/Cu-1000.

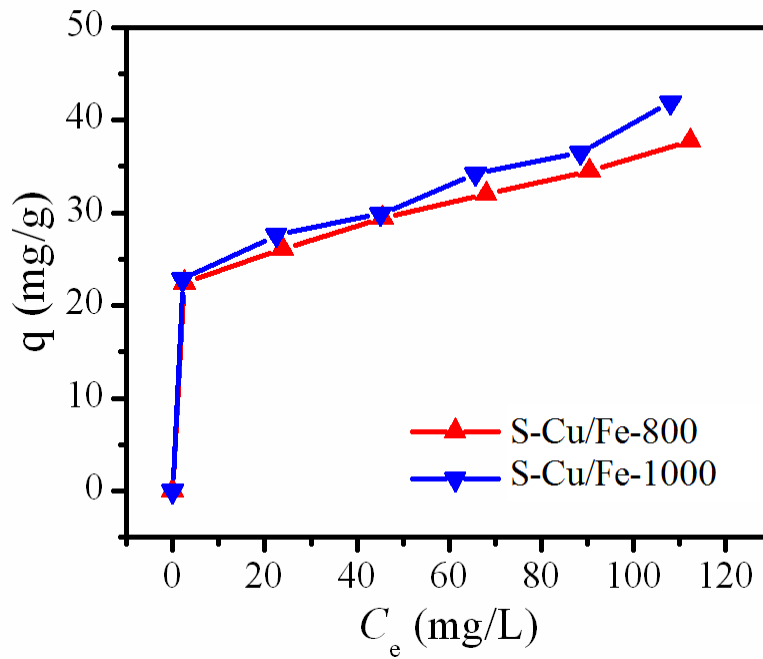

Figure s4. Isotherm removal curves of Cr(VI) on S-Cu/Fe-800 and S-Cu/Fe-1000 at pH 3 and room temperature (Initial concentrations of Cr(VI) vary from 20 to 150 mg/L)

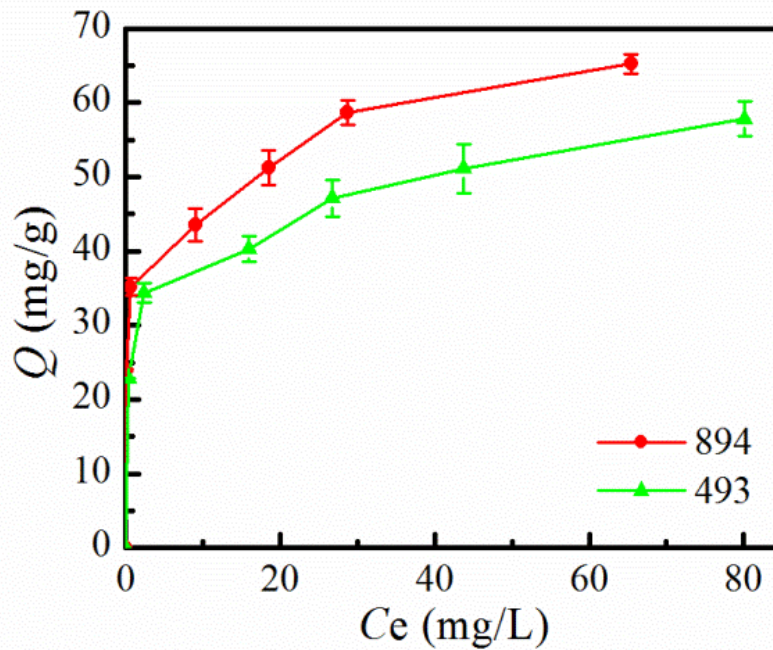

Figure s5. Cr(VI) removal isotherms (25°C) on S-Cu/Fe-800 generated from the spent Cu/Fe-LDH loaded with different OII amount (894 and 493 mg/g)

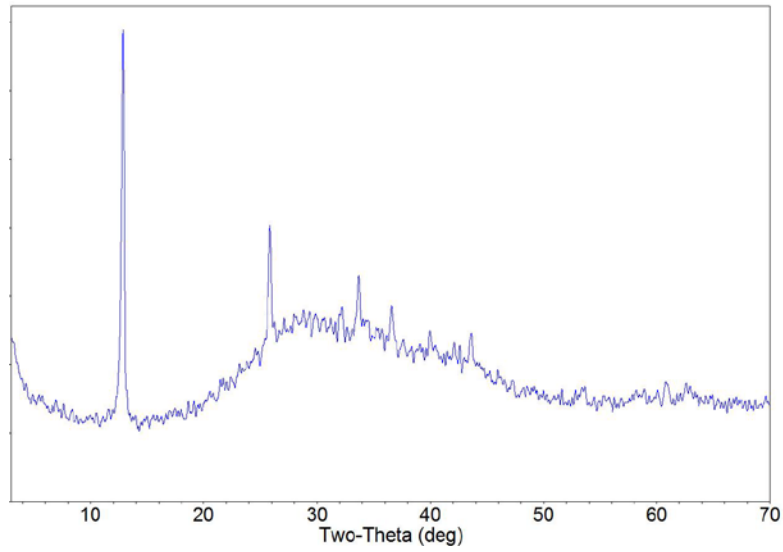

Figure s6. XRD patterns of LDH prepared from waste metal solution (Synthesis at pH 6.0, aging at 75°C for 24 h)

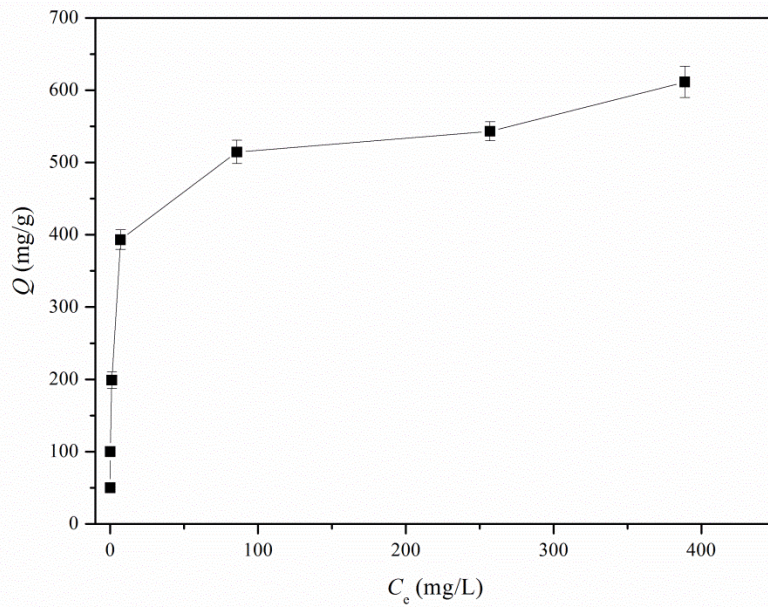

Figure s7. Adsorption isotherm of Orange II on regenerated Cu/Fe-LDH under 25°C
